# Supplementary material for: IL-22 induces Reg3γ and inhibits allergic inflammation in house dust mite–induced asthma models
Source: PubMed Central journal article supplement — J Exp Med. 2017 Oct 2;214(10):3037–50. doi: 10.1084/jem.20162108 (PMC5626396; doi:10.1084/jem.20162108), 2017-10-02
Supplement: JEM_20162108_sm.pdf [file JEM_20162108_sm.pdf]

SUPPLEMENTAL MATERIAL

Ito et al., <https://doi.org/10.1084/jem.20162108>

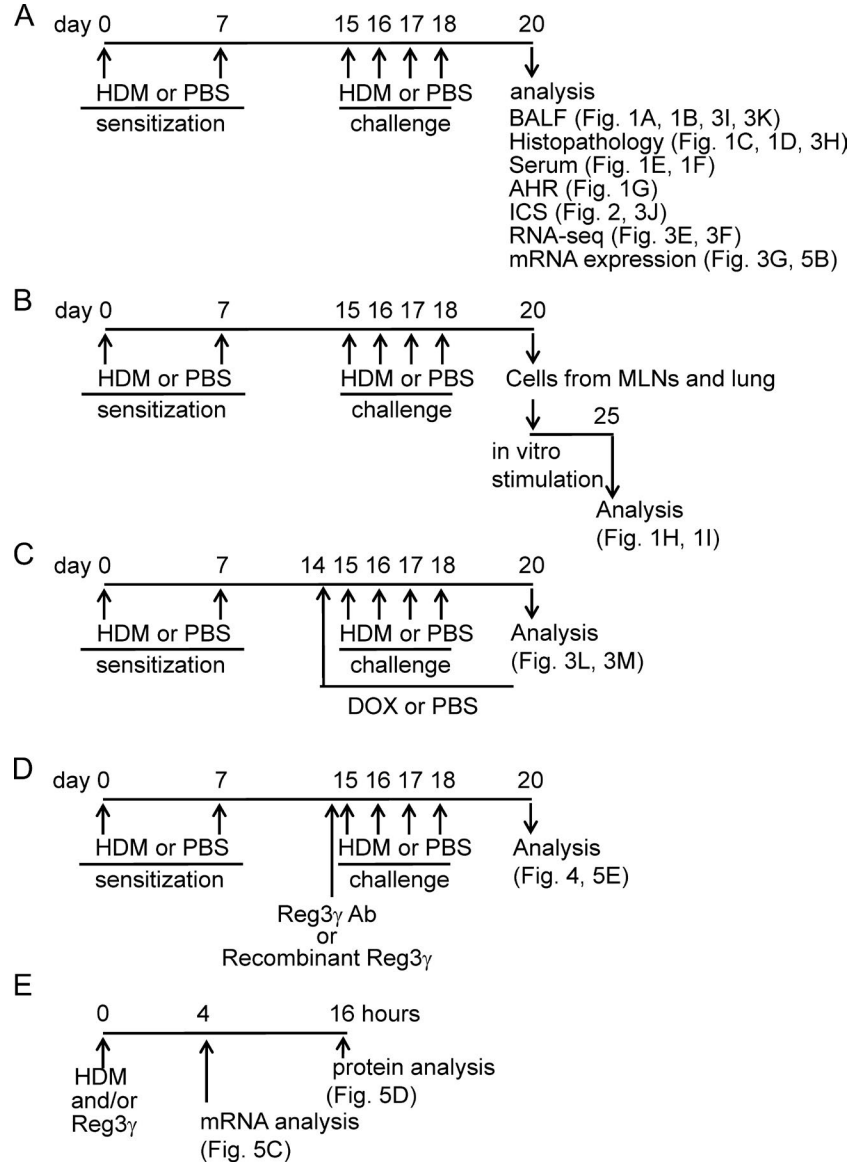

Figure S1. **Schematic diagrams of experimental protocols.** (A–E) Schematic diagrams of protocols for experiments are shown. AHR, airway hyper-reactivity; DOX, doxycycline; ICS, intracellular cytokine staining.
